# Supplementary material
Source: ML conference proceedings conference paper supplement (https://openreview.net/forum?id=TaHeCGU69A)

Categorical Distribution: Simulation vs Real (Building Type)

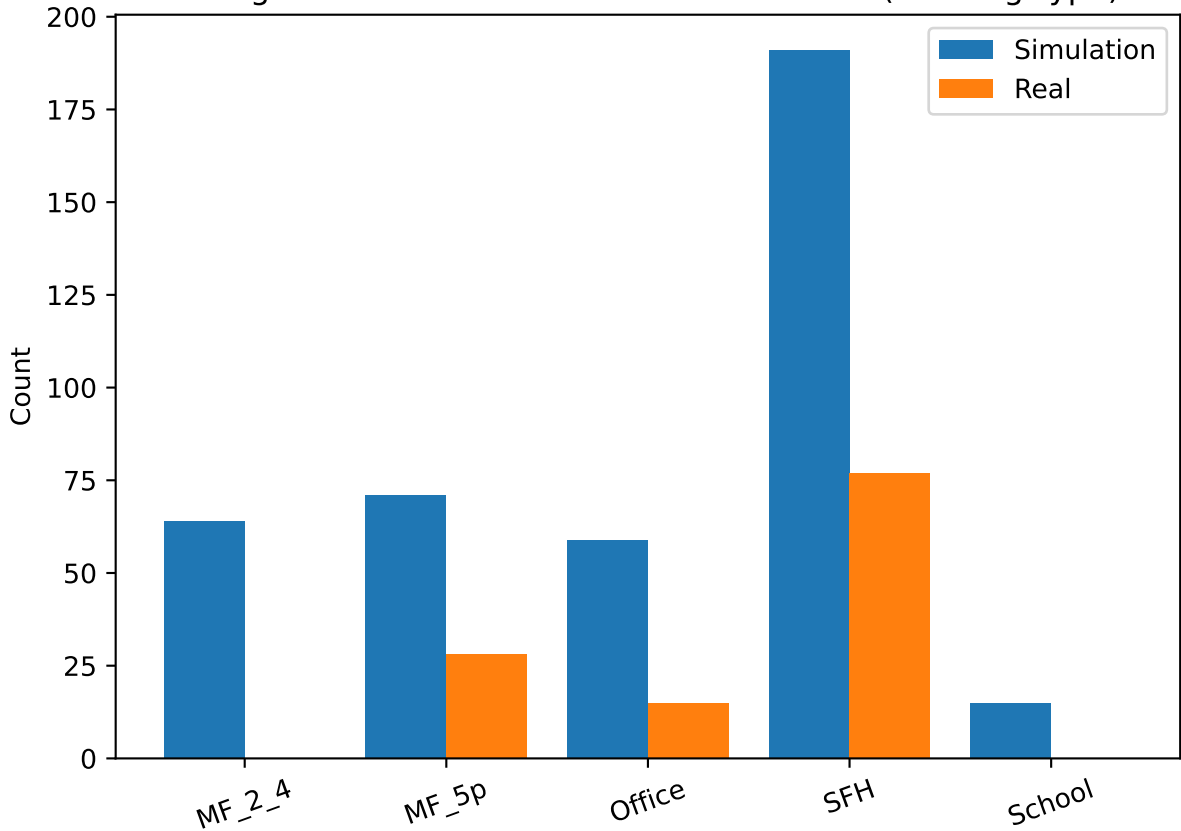

Supplement: supplementary_material [file dist_categorical_building_type.pdf › agents4science_paper/figs/dist_categorical_building_type.pdf]

Distribution: Simulation vs Real (Floor Area)

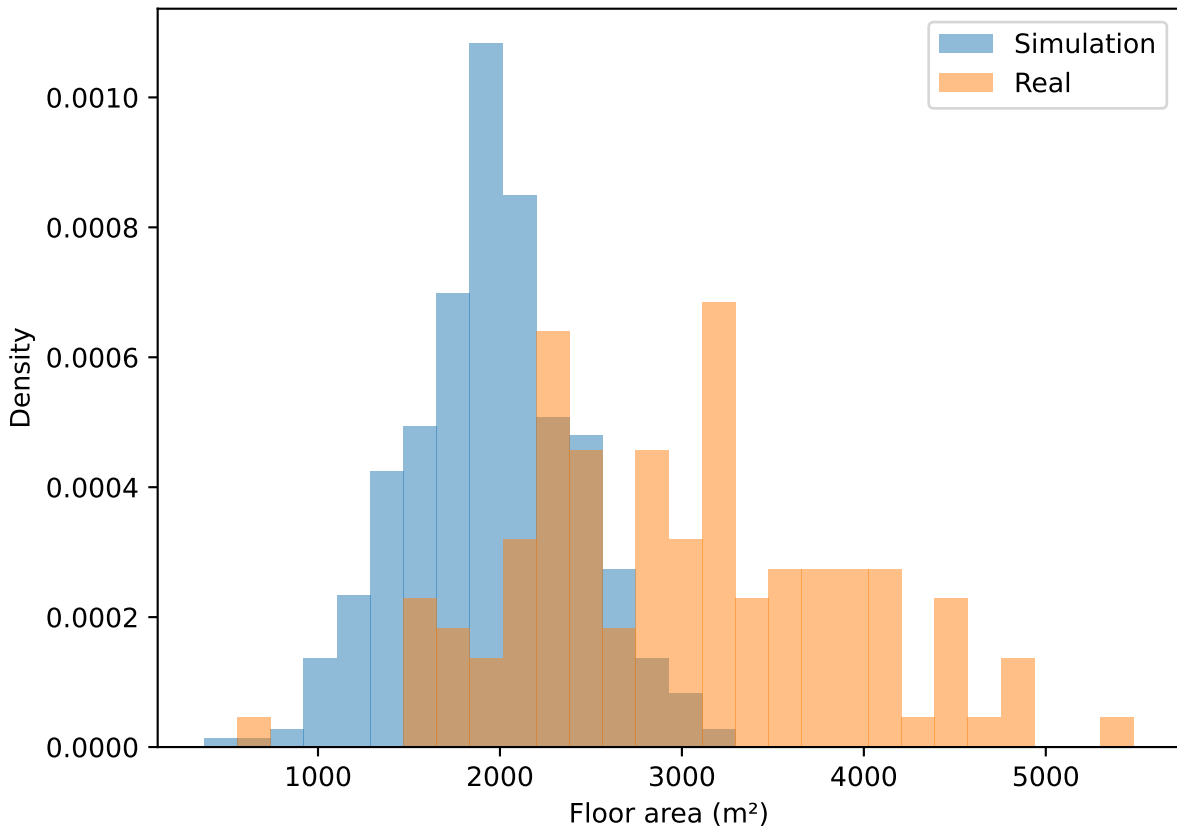

Supplement: supplementary_material [file dist_numeric_floor_area.pdf › agents4science_paper/figs/dist_numeric_floor_area.pdf]

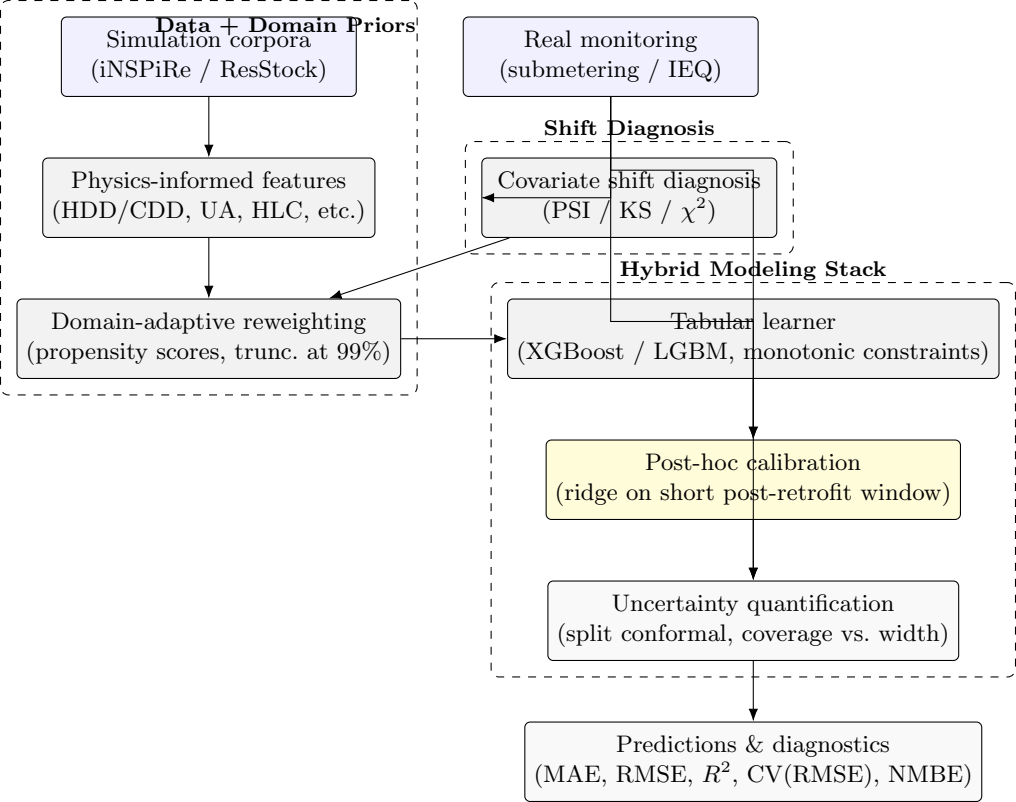

Supplement: supplementary_material [file framework_standalone.pdf › agents4science_paper/figs/framework_standalone.pdf]

Performance Comparison (Absolute)

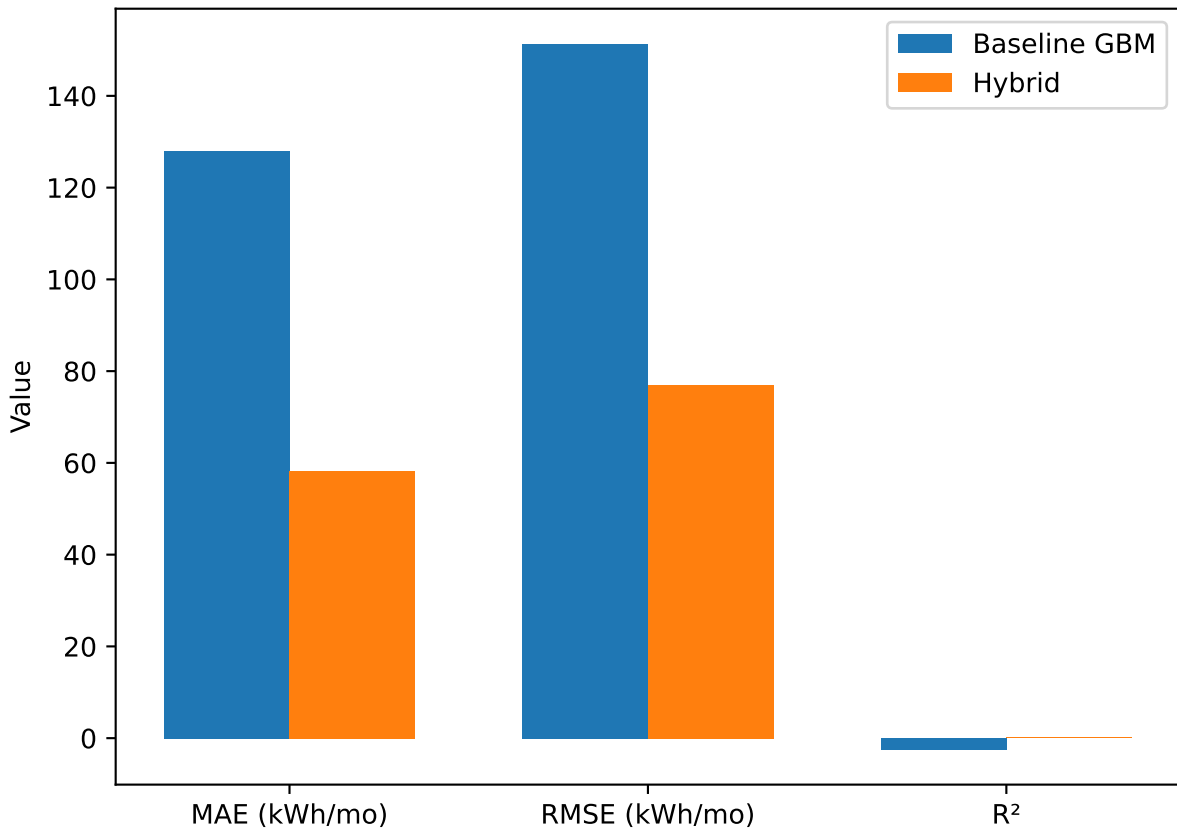

Supplement: supplementary_material [file perf_absolute.pdf › agents4science_paper/figs/perf_absolute.pdf]

# Hybrid Gains over Baseline

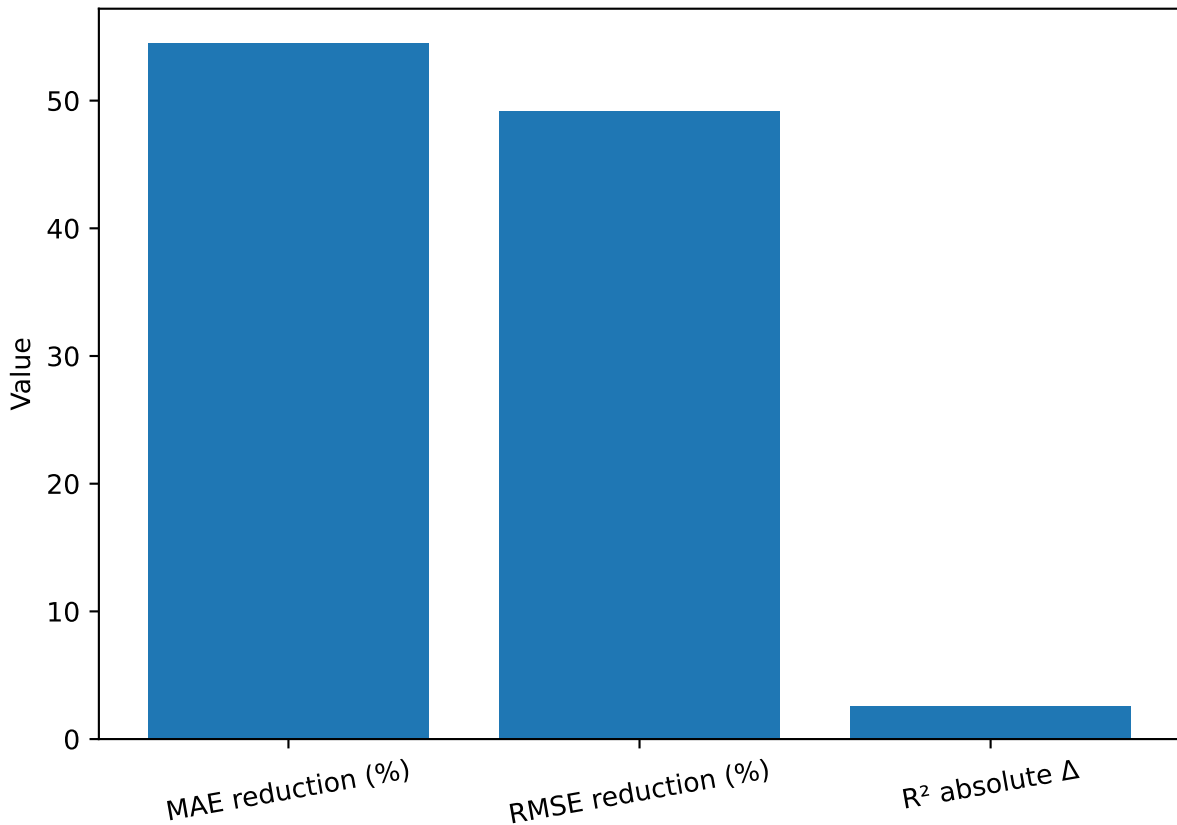

Supplement: supplementary_material [file perf_improvement.pdf › agents4science_paper/figs/perf_improvement.pdf]
